# Supplementary material for: Phase 2 trial design of BMS-986278, a lysophosphatidic acid receptor 1 (LPA1) antagonist, in patients with idiopathic pulmonary fibrosis (IPF) or progressive fibrotic interstitial lung disease (PF-ILD)
Source: PubMed Central journal article supplement — BMJ Open Respir Res. 2021 Dec 28;8(1):e001026. doi: 10.1136/bmjresp-2021-001026 (PMC8718498; doi:10.1136/bmjresp-2021-001026), 2021-12-28
Supplement: bmjresp-2021-001026supp001.pdf [file bmjresp-2021-001026supp001.pdf]

Supplemental Table 1. Schedule of Key Study Activities

| Activity                                                           | Screening<br>(Day -28<br>to Day -1) | Treatment period (Day 1 to Week 26)           |                       |                   |                    |                    |                     |                      |                      |                      | PTFU |
|--------------------------------------------------------------------|-------------------------------------|-----------------------------------------------|-----------------------|-------------------|--------------------|--------------------|---------------------|----------------------|----------------------|----------------------|------|
|                                                                    |                                     | Day<br>1                                      | Day<br>2 <sup>a</sup> | ± 3 days          |                    | ± 5 days           |                     |                      |                      |                      |      |
|                                                                    |                                     |                                               |                       | Week 1<br>(Day 8) | Week 4<br>(Day 29) | Week 8<br>(Day 57) | Week 12<br>(Day 85) | Week 16<br>(Day 113) | Week 20<br>(Day 141) | Week 26<br>(Day 183) |      |
| <b>Laboratory/Safety Assessments</b>                               |                                     |                                               |                       |                   |                    |                    |                     |                      |                      |                      |      |
| 12-lead ECG                                                        | X                                   | X                                             |                       |                   | X                  |                    | X                   |                      |                      | X                    |      |
| Clinical lab samples<br>(hematology, chemistry,<br>and urinalysis) | X                                   | X                                             |                       | X                 | X                  | X                  | X                   | X                    | X                    | X                    | X    |
| Physical exam                                                      | X                                   | X                                             |                       |                   | X                  |                    | X                   |                      |                      | X                    | X    |
| Vital signs                                                        | X                                   | X                                             | X                     | X                 | X                  | X                  | X                   | X                    | X                    | X                    | X    |
| Orthostatic evaluations                                            | X                                   | X                                             | X                     | X                 | X                  | X                  | X                   | X                    | X                    | X                    | X    |
| Adverse events                                                     |                                     | From first dose throughout study <sup>b</sup> |                       |                   |                    |                    |                     |                      |                      |                      |      |
| <b>PK and Biomarker Assessments</b>                                |                                     |                                               |                       |                   |                    |                    |                     |                      |                      |                      |      |
| PK sampling: sparse and<br>intensive substudy <sup>c</sup>         |                                     | X                                             |                       |                   | X                  |                    | X                   |                      |                      | X                    |      |
| Blood samples for<br>exploratory biomarkers                        |                                     | X                                             |                       |                   | X                  |                    | X                   |                      |                      | X                    |      |
| <b>Efficacy Assessments</b>                                        |                                     |                                               |                       |                   |                    |                    |                     |                      |                      |                      |      |
| HRCT                                                               | X                                   |                                               |                       |                   |                    |                    |                     |                      |                      | X                    |      |
| Spirometry                                                         | X                                   | X                                             |                       |                   | X                  | X                  | X                   | X                    | X                    |                      |      |
| D <sub>LCO</sub> SB                                                | X                                   | X                                             |                       |                   |                    |                    | X                   |                      |                      | X                    |      |
| <b>Clinical Outcome Assessments</b>                                |                                     |                                               |                       |                   |                    |                    |                     |                      |                      |                      |      |
| PROs: L-PF, SGRQ,<br>UCSD SOBQ, Cough VAS                          |                                     | X                                             |                       |                   |                    |                    | X                   |                      |                      | X                    |      |
| 6MWT                                                               |                                     | X                                             |                       |                   |                    |                    | X                   |                      |                      | X                    |      |
| O <sub>2</sub> titration                                           | X                                   |                                               |                       |                   |                    |                    |                     |                      |                      |                      |      |

<sup>a</sup>Clinic visits at this time point are only required for those participants who meet low blood pressure criteria on Day 1; <sup>b</sup>Additionally, serious adverse events will be collected from time of informed consent until 30 days from the last visit; <sup>c</sup>Serial ECGs will be collected and blood pressure and heart rate will be measured at each time point for patients in the intensive PK substudy. 6MWT, 6-minute walk test; DLCO SB, single-breath diffusing capacity of the lung; ECG, electrocardiogram; HRCT, high resolution computed tomography; L-PF, Living with Pulmonary Fibrosis Questionnaire; PK, pharmacokinetics; PRO, patient-reported outcome; PTFU, posttreatment follow-up; SGRQ, St. George's Respiratory Questionnaire; UCSD SOBQ, University of California San Diego Shortness of Breath Questionnaire; VAS, visual analogue scale.
